# Supplementary material for: Extreme prematurity and sepsis strongly influence frequencies and functional characteristics of circulating γδ T and natural killer cells
Source: PubMed Central journal article supplement (PMC8192243; doi:10.1002/cti2.1294), 2021-06-10
Supplement: CTI2-10-e1294-s001.pdf [file CTI2-10-e1294-s001.pdf]

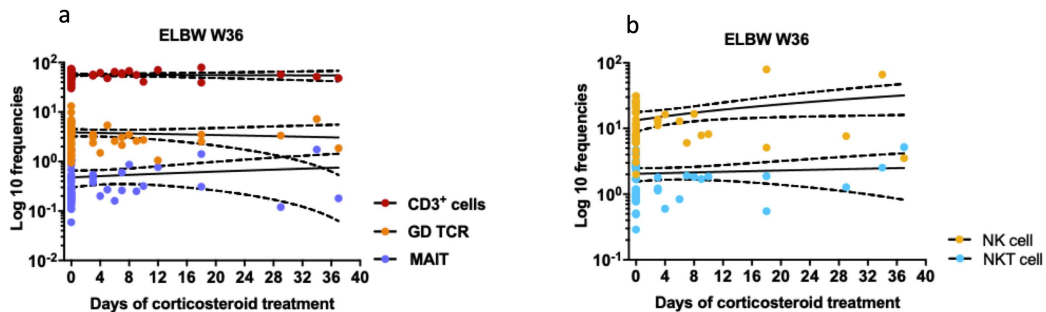

**Supplementary figure 1.** Long term corticosteroid exposure has no effect on the frequencies of the NKT- or NK cell compartments at week 36. Correlations between the days of corticosteroid exposure and the percentages of **(a)** CD3<sup>+</sup> T-,  $\gamma\delta$  T-, MAIT cells and **(b)** NK- and NKT cells in ELGAN/ELBE at week 36.

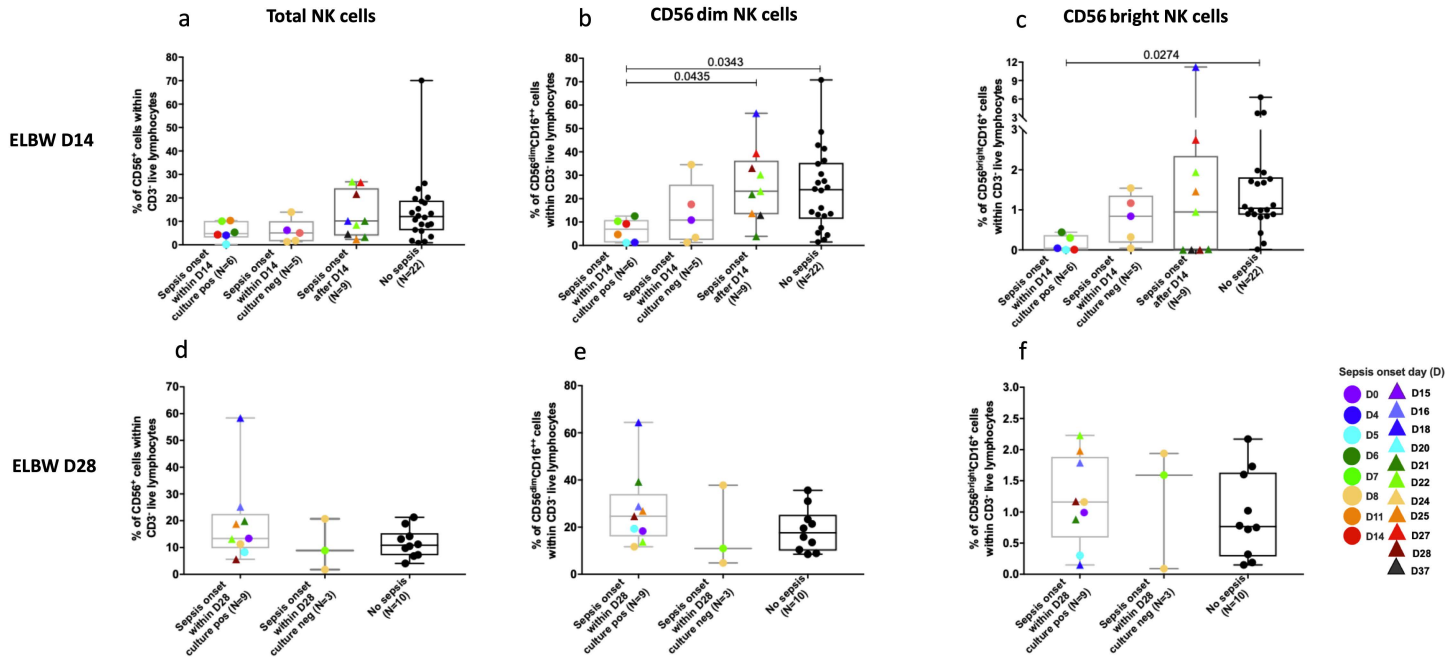

**Supplementary figure 2.** The frequencies of NK cells and their subpopulations in culture negative (culture neg) sepsis cases do not differ from any of the other groups. **(a-c)** show the proportions of total NK-, CD56dim – and CD56bright NK-cell frequencies respectively, in 14-day old ELGAN/ELBW with sepsis onset within 14 days of life, culture pos and culture neg, after day 14 of age, or no sepsis. **(d-f)** show the proportions of total NK-, CD56dim – and CD56bright NK-cell frequencies respectively, in 28-day old ELGAN/ELBW with sepsis onset within 28 days after birth (culture pos and neg) or no sepsis.

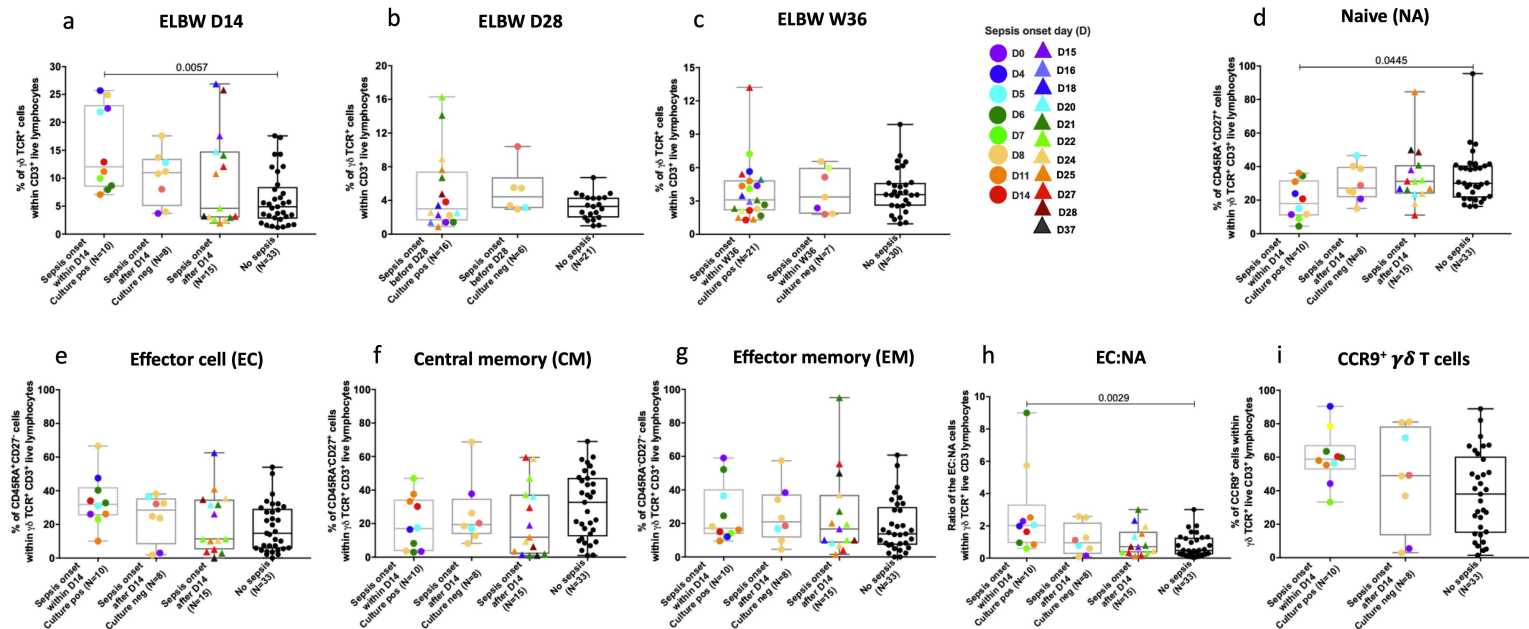

**Supplementary figure 3.** The frequencies of  $\gamma\delta$  T cells and their subpopulations do not differ between culture negative (culture neg) sepsis cases and any of the other groups. **(a-c)** show the proportions of total  $\gamma\delta$  T cell in 14-day, 28-day and 36 PMW old ELGAN/ELBW children in relation to time of disease onset as indicated in the figure. **(d-g)** show the proportions of  $\gamma\delta$  T cell naïve, effector and memory subpopulations in the PBMCs of 14-day old ELGAN/ELBW, **(h)** shows the ratio between EC:NA  $\gamma\delta$  T cells and **(i)** displays the frequencies of CCR9<sup>+</sup>  $\gamma\delta$  T cells in relation to sepsis onset (both culture pos and neg).

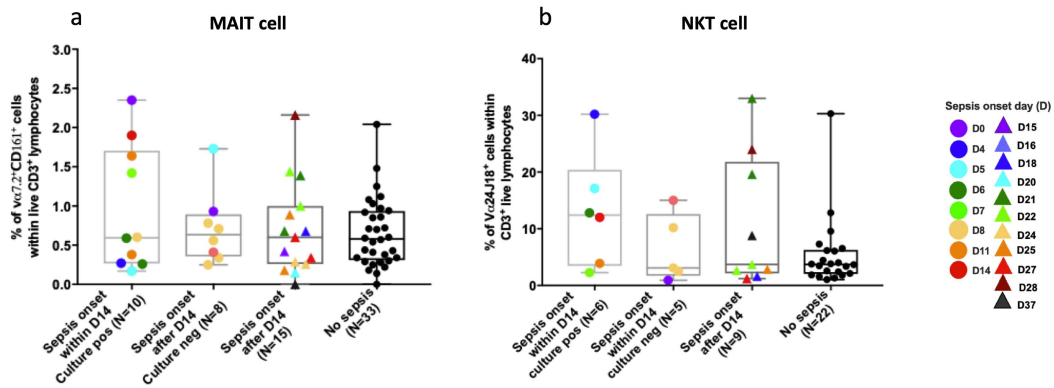

**Supplementary figure 4.** Peripheral MAIT- and NKT cells are not affected by sepsis. Comparison of the proportions of (a) MAIT- and (b) NKT cells from 14-day old ELGAN/ELBW neonates in relation to the time of sepsis onset including culture negative sepsis cases.

**Supplementary table 1. Proportions of NK and unconventional T cells<sup>1</sup>**

| Cell populations                   | Percentages of | FT D14 | ELBW D14  | ELBW D28  | ELBW W36 |
|------------------------------------|----------------|--------|-----------|-----------|----------|
| %CD3+ T <sup>a</sup>               | Median         | 76.2   | 20.4****  | 56.5****  | 57.3**** |
|                                    | IQR            | 7.2    | 48.27     | 23.55     | 18.7     |
| %γδ T cells <sup>b</sup>           | Median         | 1.91   | 6.38****  | 3.15      | 3.5      |
|                                    | IQR            | 1.67   | 9.1       | 2.72      | 2.55     |
| %γδ NA <sup>c</sup>                | Median         | 40.3** | 28.55     | 30.2      | 26****   |
|                                    | IQR            | 41.05  | 18.25     | 25.7      | 14.25    |
| %γδ EC <sup>c</sup>                | Median         | 4.62   | 23.25**** | 7.56      | 8.87     |
|                                    | IQR            | 5.2    | 25.41     | 16.33     | 13.28    |
| %γδ EM <sup>c</sup>                | Median         | 2.28   | 16.2      | 8.84      | 10.8**   |
|                                    | IQR            | 9.05   | 23.99     | 14.92     | 12.76    |
| %γδ CM <sup>c</sup>                | Median         | 40     | 20.4      | 35.4      | 46.7     |
|                                    | IQR            | 55.97  | 35        | 42.2      | 24.15    |
| %MAIT cells <sup>b</sup>           | Median         | 0.68   | 0.59      | 0.43      | 0.26     |
|                                    | IQR            | 1.47   | 0.64      | 0.45      | 0.34     |
| %NKT cells <sup>b</sup>            | Median         | 1.58   | 3.81****  | 1.48      | 1.76     |
|                                    | IQR            | 1.53   | 7.78      | 2.59      | 1.77     |
| %Total NK cells <sup>d</sup>       | Median         | 33.8   | 9.4****   | 11.25**** | 10.7**** |
|                                    | IQR            | 18.38  | 12.03     | 11.35     | 10.01    |
| %CD56 Dim NK cells <sup>d</sup>    | Median         | 35.35  | 16****    | 19.4**    | 19.8***  |
|                                    | IQR            | 27.7   | 22.96     | 18.3      | 23.9     |
| %CD56 Bright NK cells <sup>d</sup> | Median         | 6.28   | 0.89****  | 1****     | 1.71**** |
|                                    | IQR            | 5.93   | 1.62      | 1.38      | 1.83     |

<sup>1</sup> Values are given as percentage of median and interquartile range (IQR). Significant differences with full-term (FT) controls are shown as asterisks.

\* $P \leq 0.05$ . \*\* $P \leq 0.01$ . \*\*\* $P \leq 0.001$ . \*\*\*\* $P \leq 0.0001$ . <sup>a</sup>Percentages of cells within live lymphocytes. <sup>b</sup>percentages of cells within live CD3<sup>+</sup> cells.

<sup>c</sup>percentages of cells within total γδ T cells. <sup>d</sup>Percentages of cells within CD3<sup>-</sup> cells.

**Supplementary table 2. Percentages of NKT and NK cell subsets in the PBMCs of ELBW preterm neonates supplemented with *Lactobacillus reuteri* or placebo<sup>1</sup>**

| Cell populations     |        | ELBW D14                 |                | ELBW D28                 |                | ELBW W36                 |                | P-Value |
|----------------------|--------|--------------------------|----------------|--------------------------|----------------|--------------------------|----------------|---------|
|                      |        | <i>L. reuteri</i> (N=21) | Placebo (N=22) | <i>L. reuteri</i> (N=10) | Placebo (N=14) | <i>L. reuteri</i> (N=20) | Placebo (N=28) |         |
| NKT cells            | Median | 4.49                     | 3.73           | 1.66                     | 1.32           | 2.52                     | 1.69           | NS      |
|                      | IQR    | 9.31                     | 7.69           | 3.88                     | 1.93           | 1.92                     | 1.57           |         |
| Total NK cells       | Median | 8.48                     | 10.25          | 10.85                    | 12.25          | 11.8                     | 9.25           | NS      |
|                      | IQR    | 11.96                    | 12.18          | 11.08                    | 11.98          | 18.34                    | 10.47          |         |
| CD56 Dim NK cells    | Median | 23.2                     | 14             | 23                       | 18.8           | 19.45                    | 16.75          | NS      |
|                      | IQR    | 25.29                    | 21.18          | 19.83                    | 19.5           | 19.13                    | 25.39          |         |
| CD56 Bright NK cells | Median | 0.95                     | 0.86           | 1.59                     | 0.76           | 1.61                     | 1.72           | NS      |
|                      | IQR    | 1.93                     | 0.97           | 1.03                     | 1.05           | 2.17                     | 1.60           |         |

<sup>1</sup>Values are given as percentage of median and interquartile range (IQR).

**Supplementary table 3. Characteristics of the sepsis cases.**

| Individual                       | Day of sepsis onset | Study group       | Inclusion site | GW | Sex  | Delivery mode | PPROM | Chorioamnionitis |
|----------------------------------|---------------------|-------------------|----------------|----|------|---------------|-------|------------------|
| <i>Culture-positive sepsis*</i>  |                     |                   |                |    |      |               |       |                  |
| 1                                | 22                  | <i>L. reuteri</i> | Linköping      | 27 | Boy  | Caesarean     | No    | No               |
| 2                                | 4                   | Placebo           | Stockholm      | 24 | Girl | Vaginal       | No    | No               |
| 3                                | 33                  | Placebo           | Linköping      | 26 | Girl | Caesarean     | No    | No               |
| 4                                | 21                  | <i>L. reuteri</i> | Stockholm      | 24 | Boy  | Caesarean     | Yes   | No               |
| 5                                | 22                  | <i>L. reuteri</i> | Stockholm      | 27 | Girl | Caesarean     | Yes   | No               |
| 6                                | 14                  | Placebo           | Stockholm      | 23 | Boy  | Vaginal       | No    | No               |
| 7                                | 22                  | <i>L. reuteri</i> | Linköping      | 23 | Girl | Vaginal       | Yes   | No               |
| 8                                | 5                   | <i>L. reuteri</i> | Stockholm      | 23 | Girl | Vaginal       | No    | No               |
| 9                                | 27                  | <i>L. reuteri</i> | Linköping      | 23 | Boy  | Caesarean     | No    | No               |
| 10                               | 24                  | Placebo           | Linköping      | 25 | Boy  | Caesarean     | No    | No               |
| 11                               | 7                   | <i>L. reuteri</i> | Stockholm      | 24 | Boy  | Vaginal       | No    | Yes              |
| 12                               | 15                  | <i>L. reuteri</i> | Stockholm      | 26 | Boy  | Caesarean     | No    | No               |
| 13                               | 0                   | <i>L. reuteri</i> | Stockholm      | 26 | Girl | Caesarean     | Yes   | Yes              |
| 14                               | 8                   | Placebo           | Stockholm      | 25 | Boy  | Caesarean     | No    | No               |
| 15                               | 28                  | <i>L. reuteri</i> | Stockholm      | 23 | Girl | Vaginal       | No    | Yes              |
| 16                               | 24                  | Placebo           | Stockholm      | 27 | Boy  | Caesarean     | No    | No               |
| 17                               | 6                   | <i>L. reuteri</i> | Stockholm      | 25 | Boy  | Vaginal       | Yes   | No               |
| 18                               | 25                  | <i>L. reuteri</i> | Linköping      | 25 | Boy  | Caesarean     | Yes   | No               |
| 19                               | 18                  | Placebo           | Linköping      | 26 | Girl | Caesarean     | No    | No               |
| 20                               | 20                  | <i>L. reuteri</i> | Stockholm      | 26 | Boy  | Caesarean     | Yes   | Yes              |
| 21                               | 6                   | <i>L. reuteri</i> | Stockholm      | 27 | Girl | Caesarean     | Yes   | No               |
| 22                               | 16                  | Placebo           | Stockholm      | 26 | Boy  | Caesarean     | No    | No               |
| 23                               | 11                  | <i>L. reuteri</i> | Stockholm      | 24 | Boy  | Vaginal       | No    | No               |
| 24                               | 25                  | <i>L. reuteri</i> | Stockholm      | 24 | Girl | Caesarean     | No    | No               |
| 25                               | 25                  | <i>L. reuteri</i> | Linköping      | 26 | Boy  | Vaginal       | No    | No               |
| 26                               | 37                  | <i>L. reuteri</i> | Stockholm      | 25 | Boy  | Caesarean     | Yes   | Yes              |
| 27                               | 41                  | <i>L. reuteri</i> | Stockholm      | 23 | Boy  | Vaginal       | No    | Yes              |
| 28                               | 21                  | Placebo           | Stockholm      | 23 | Boy  | Vaginal       | No    | No               |
| 29                               | 27                  | <i>L. reuteri</i> | Linköping      | 25 | Girl | Caesarean     | No    | No               |
| 30                               | 0                   | Placebo           | Stockholm      | 24 | Girl | Caesarean     | Yes   | Yes              |
| 31                               | 6                   | <i>L. reuteri</i> | Stockholm      | 26 | Girl | Caesarean     | No    | Yes              |
| 32                               | 7                   | <i>L. reuteri</i> | Linköping      | 23 | Girl | Caesarean     | No    | No               |
| 33                               | 11                  | Placebo           | Stockholm      | 24 | Boy  | Vaginal       | No    | Yes              |
| 34                               | 20                  | Placebo           | Stockholm      | 26 | Boy  | Vaginal       | Yes   | No               |
| 35                               | 9                   | Placebo           | Stockholm      | 25 | Boy  | Caesarean     | Yes   | No               |
| <i>Culture-negative sepsis**</i> |                     |                   |                |    |      |               |       |                  |
| 1                                | 7                   | <i>L. reuteri</i> | Stockholm      | 27 | Boy  | Caesarean     | No    | No               |
| 2                                | 8                   | Placebo           | Linköping      | 23 | Boy  | Vaginal       | No    | No               |
| 3                                | 67                  | Placebo           | Stockholm      | 23 | Boy  | Vaginal       | No    | No               |
| 4                                | 8                   | <i>L. reuteri</i> | Linköping      | 24 | Boy  | Caesarean     | No    | No               |
| 5                                | 0                   | Placebo           | Linköping      | 23 | Girl | Vaginal       | Yes   | Yes              |
| 6                                | 7                   | <i>L. reuteri</i> | Stockholm      | 25 | Girl | Caesarean     | Yes   | Yes              |
| 7                                | 52                  | Placebo           | Linköping      | 24 | Boy  | Vaginal       | Yes   | No               |
| 8                                | 49                  | <i>L. reuteri</i> | Linköping      | 23 | Girl | Vaginal       | No    | No               |
| 9                                | 8                   | <i>L. reuteri</i> | Linköping      | 24 | Boy  | Caesarean     | No    | No               |
| 10                               | 24                  | <i>L. reuteri</i> | Stockholm      | 26 | Girl | Caesarean     | No    | No               |
| 11                               | 13                  | Placebo           | Stockholm      | 25 | Boy  | Vaginal       | No    | No               |
| 12                               | 13                  | <i>L. reuteri</i> | Stockholm      | 25 | Girl | Caesarean     | No    | No               |
| 13                               | 8                   | Placebo           | Stockholm      | 25 | Boy  | Vaginal       | No    | No               |
| 14                               | 8                   | Placebo           | Linköping      | 23 | Girl | Vaginal       | No    | No               |
| 15                               | 5                   | Placebo           | Stockholm      | 24 | Girl | Caesarean     | No    | No               |
| 16                               | 37                  | <i>L. reuteri</i> | Stockholm      | 25 | Boy  | Caesarean     | Yes   | Yes              |
| 17                               | 22                  | <i>L. reuteri</i> | Linköping      | 25 | Girl | Vaginal       | No    | No               |
| 18                               | 45                  | <i>L. reuteri</i> | Stockholm      | 24 | Boy  | Caesarean     | No    | No               |

\*For culture-positive sepsis a diagnosis required a positive blood and/or cerebral spinal fluid culture together with a minimum of 2 out of 4 of the following: 1. White blood cell (WBC) count  $\leq 5$  or  $\geq 20 \times 10^9$  cells/L; 2. Total platelet count  $\leq 100 \times 10^9$  cells/L; 3. CRP  $\geq 15$  mg/L; 4. Newly recognised apnea, elevated oxygen demand or requirement of respiratory support. In case of a positive culture of coagulase-negative staphylococci, the culture-positive sepsis diagnosis required two separate positive blood cultures with the same antibiotic resistance pattern and/or a central venous/arterial line prior to sepsis onset together with at least 1 of the laboratory criteria (1-3) mentioned before and clinical deterioration (criteria 4). \*\*For culture-negative sepsis a diagnosis required a negative blood culture and at least 3 out of the mentioned criteria (1-4) for culture-positive sepsis. GW, gestational week at birth; PPROM, preterm premature rupture of membranes; *L. reuteri*, *Lactobacillus reuteri*.
